# Supplementary material
Source: PubMed Central journal article supplement (PMC4084435)
Supplement: 1407935111_pnas.201407935SI.pdf [file 1407935111_pnas.201407935SI.pdf]

# Supporting Information

Ferris et al. 10.1073/pnas.1407935111

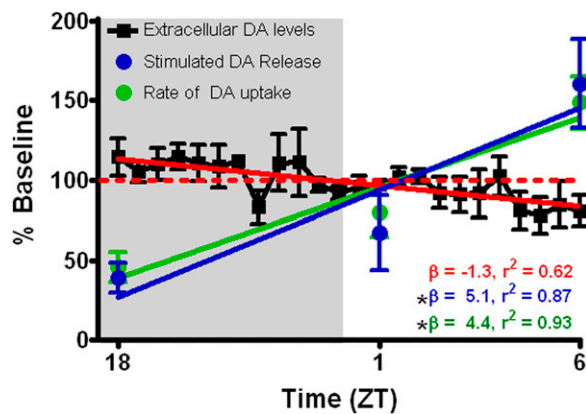

Fig. S1. Extracellular dopamine ( $[DA]_{\text{ext}}$ , black), stimulated dopamine release ( $[DA]_{\text{or}}$ , blue), and the rate of dopamine uptake ( $V_{\text{max}}$ , green), expressed as percent of baseline between zeitgeber time (ZT) 18 and ZT6, demonstrates an inverse relationship between  $[DA]_{\text{ext}}$  and  $[DA]_{\text{or}}$ , and between  $[DA]_{\text{ext}}$  and  $V_{\text{max}}$  ( $*P < 0.05$ ).
